# Supplementary material for: A Hybrid CNN-PSO Model for Efficient DDoS Detection in SDN
Source: Research Square preprint supplement (doi:10.21203/rs.3.rs-8074383/v1), 2025-12-01
Supplement: Supplementary file 1 [file dca751d17af9ddfe5594d4bd.docx]

**Supplementary**

1. !pip install pygad
2. !pip install pygad.kerasga
3. import os
4. import pandas as pd
5. import numpy as np
6. import tensorflow as tf
7. import pygad
8. import pygad.kerasga
9. import matplotlib.pyplot as plt
10. from sklearn.model_selection import train_test_split
11. from sklearn.preprocessing import StandardScaler
12. from sklearn.metrics import accuracy_score, recall_score, precision_score, f1_score, roc_auc_score
13. from imblearn.over_sampling import SMOTE
14. from tensorflow.keras.models import Sequential
15. from tensorflow.keras.layers import Dense, Conv1D, MaxPooling1D, Flatten, Dropout, BatchNormalization, Input
16. from tensorflow.keras.optimizers import Adam
17. from tensorflow.keras.utils import to_categorical
18. from tensorflow.keras.models import load_model
19. # Uploading dataset
20. def load_data(file_paths):
21. dataframes = [pd.read_csv(path) for path in file_paths]
22. combined_data = pd.concat(dataframes, axis=0)
23. combined_data.drop(columns=['Flow ID', 'Source IP', 'Destination IP', 'Timestamp'], errors='ignore', inplace=True)
24. combined_data.fillna(0, inplace=True)
25. return combined_data
26. # Preprocessing dataset
27. def preprocess_data(data):
28. X = data.drop(columns=['Label']).values #
29. y = data['Label'].factorize()[0]
30. scaler = StandardScaler()
31. X = scaler.fit_transform(X)
32. X_train, X_test, y_train, y_test = train_test_split(X, y, test_size=0.2, random_state=42)
33. smote = SMOTE()
34. X_train, y_train = smote.fit_resample(X_train, y_train)
35. X_train = X_train.reshape(X_train.shape[0], X_train.shape[1], 1)
36. X_test = X_test.reshape(X_test.shape[0], X_test.shape[1],
37. y_train = to_categorical(y_train)
38. y_test = to_categorical(y_test)
39. #one-hot encoding
40. return X_train, X_test, y_train, y_test
41. # Defining CNN Model
42. def build_cnn(input_shape,num_classes, filters=64, kernel_size=3 , dropout_rate=0.5, lr=0.0003):
43. model = Sequential([
44. Input(shape=input_shape),
45. Conv1D(filters, kernel_size, activation='relu'),
46. BatchNormalization(),
47. MaxPooling1D(pool_size=2),
48. Dropout(dropout_rate),
49. Conv1D(filters*2, kernel_size, activation='relu'),
50. BatchNormalization(),
51. MaxPooling1D(pool_size=2),
52. Dropout(dropout_rate),
53. Flatten(),
54. Dense(128, activation='relu'),
55. Dropout(dropout_rate),
56. Dense(num_classes, activation='softmax')
57. ])
58. model.compile(optimizer=Adam(learning_rate=lr), loss='categorical_crossentropy', metrics=['accuracy'])
59. return model
60. # Training Model
61. def train_model(model, X_train, y_train, X_test, y_test, epochs=50, batch_size=256):
62. history = model.fit(X_train, y_train, epochs=epochs, batch_size=batch_size, validation_data=(X_test, y_test))
63. return model, history
64. #Evalutaing Model
65. def evaluate_model(model, X_test, y_test):
66. y_pred_probs = model.predict(X_test)
67. y_pred = np.argmax(y_pred_probs, axis=1)
68. y_true = np.argmax(y_test, axis=1)
69. metrics = {
70. "Accuracy": float(accuracy_score(y_true, y_pred) * 100),
71. "Precision": float(precision_score(y_true, y_pred, average='weighted') * 100),
72. "Recall": float(recall_score(y_true, y_pred, average='weighted') * 100),
73. "F1 Score": float(f1_score(y_true, y_pred, average='weighted') * 100),
74. "AUC": float(roc_auc_score(y_test, y_pred_probs, multi_class='ovr') * 100)
75. }
76. return metrics
77. # Optimazing by PSO
78. def optimize_pso(model, X_test, y_test, generations=15, population_size=10 , mutation_rate=0.4):
79. keras_ga = pygad.kerasga.KerasGA(model=model, num_solutions=population_size)
80. # Setting Genetics algo
81. if keras_ga.population_weights is None or len(keras_ga.population_weights) == 0:
82. raise ValueError("Error: Initial population weights are empty! PSO cannot run.")
83. def fitness_func(ga_instance, solution, sol_idx):
84. new_weights = pygad.kerasga.model_weights_as_matrix(model, solution)
85. model.set_weights(new_weights)
86. if X_test is None or y_test is None or len(X_test) == 0:
87. print("⚠️ Warning: Empty test dataset!")
88. return 0
89. try:
90. loss, accuracy = model.evaluate(X_test, y_test, batch_size=min(32, len(X_test)), verbose=0)
91. # Evaluate model by testing Data
92. except Exception as e:
93. print("Error during fitness evaluation:", e)
94. return 0
95. if np.isnan(accuracy) or np.isnan(loss):
96. return 0
97. return accuracy - (0.2 * loss)
98. ga_instance = pygad.GA(
99. num_generations=generations,
100. num_parents_mating=5,
101. initial_population=keras_ga.population_weights,
102. fitness_func=fitness_func,
103. mutation_probability=mutation_rate,
104. keep_parents=2
105. )
106. # Apply Genetics Algorithm
107. ga_instance.run()
108. if ga_instance.best_solution() is None:
109. raise ValueError("Error: No valid solution was found!")
110. best_solution = ga_instance.best_solution()[0]
111. # Best Solution
112. best_weights = pygad.kerasga.model_weights_as_matrix(model, best_solution)
113. # Apply the best wight to model
114. model.set_weights(best_weights)
115. return model
116. # Result in Charts
117. # Accuracy
118. def plot_accuracy(history, title):
119. plt.figure(figsize=(10, 7))
120. plt.plot(history.history['accuracy'], label='Train Accuracy', marker='o')
121. plt.plot(history.history['val_accuracy'], label='Validation Accuracy', marker='o')
122. plt.xlabel("Epochs")
123. plt.ylabel("Accuracy (%)")
124. plt.title(title)
125. plt.legend()
126. plt.show()
127. # Data Loss
128. def plot_loss(history, title):
129. plt.figure(figsize=(10, 7))
130. plt.plot(history.history['loss'], label='Train Loss', marker='o')
131. plt.plot(history.history['val_loss'], label='Validation Loss', marker='o')
132. plt.xlabel("Epochs")
133. plt.ylabel("Loss")
134. plt.title(title)
135. plt.legend()
136. plt.show()
137. # AUC
138. def plot_auc(auc_value, title):
139. plt.figure(figsize=(5, 5))
140. plt.bar([title], [auc_value], color='blue')
141. plt.text(0, auc_value, f"{auc_value:.2f}%", ha='center', va='bottom')
142. plt.ylabel("AUC (%)")
143. plt.title(title)
144. plt.show()
145. # Chartting all Measurments
146. def plot_all_metrics(metrics, title):
147. plt.figure(figsize=(8, 5))
148. keys = list(metrics.keys())
149. values = list(metrics.values())
150. plt.bar(keys, values, color='purple')
151. for i, v in enumerate(values):
152. plt.text(i, v, f"{v:.2f}%", ha='center', va='bottom')
153. plt.ylabel("Values (%)")
154. plt.title(title)
155. plt.show()
156. # comparison with and without PSO
157. def plot_comparison(base_metrics, optimized_metrics):
158. metrics_names = list(base_metrics.keys())
159. base_values = list(base_metrics.values())
160. optimized_values = list(optimized_metrics.values())
161. x = np.arange(len(metrics_names))
162. width = 0.35
163. plt.figure(figsize=(10, 5))
164. plt.bar(x - width/2, base_values, width, label='Without PSO', color='red')
165. plt.bar(x + width/2, optimized_values, width, label='With PSO', color='green')
166. for i, v in enumerate(base_values):
167. plt.text(i - width/2, v, f"{v:.2f}%", ha='center', va='bottom')
168. for i, v in enumerate(optimized_values):
169. plt.text(i + width/2, v, f"{v:.2f}%", ha='center', va='bottom')
170. plt.xticks(ticks=x, labels=metrics_names)
171. plt.ylabel("Values (%)")
172. plt.legend()
173. plt.title("Comparison of Model Metrics with and without PSO")
174. plt.show()
175. # main presentaion
176. if __name__ == "__main__":
177. file_paths = ["/content/UDPLag.csv", "/content/UDP.csv", "/content/Syn.csv", "/content/Portmap.csv", "/content/LDAP.csv", "/content/MSSQL.csv", "/content/NetBIOS.csv"]
178. combined_data = load_data(file_paths)
179. X_train, X_test, y_train, y_test = preprocess_data(combined_data)
180. cnn_model = build_cnn(input_shape=(X_train.shape[1], 1), num_classes=y_train.shape[1])
181. cnn_model, history = train_model(cnn_model, X_train, y_train, X_test, y_test)
182. base_metrics = evaluate_model(cnn_model, X_test, y_test)
183. optimized_model = optimize_pso(cnn_model, X_test, y_test)
184. optimized_model, history_pso = train_model(optimized_model, X_train, y_train, X_test, y_test)
185. optimized_metrics = evaluate_model(optimized_model, X_test, y_test)
186. cnn_model.save("/content/cnn_model.h5")
187. optimized_model.save("/content/optimized_pso_cnn_model.h5")
188. print("✅ Model saved successfully!")
189. # Example Usage
190. plot_accuracy(history, "CNN Without PSO - Accuracy")
191. plot_accuracy(history_pso, "CNN With PSO - Accuracy")
192. plot_loss(history, "CNN Without PSO - Loss")
193. plot_loss(history_pso, "CNN With PSO - Loss")
194. plot_auc(base_metrics['AUC'], "CNN Without PSO - AUC")
195. plot_auc(optimized_metrics['AUC'], "CNN With PSO - AUC")
196. plot_all_metrics(base_metrics, "CNN Without PSO - All Metrics")
197. plot_all_metrics(optimized_metrics, "CNN With PSO - All Metrics")
198. plot_comparison(base_metrics, optimized_metrics)
